# Supplementary material
Source: PubMed Central journal article supplement (PMC3384715)

Supplemental Figure 1

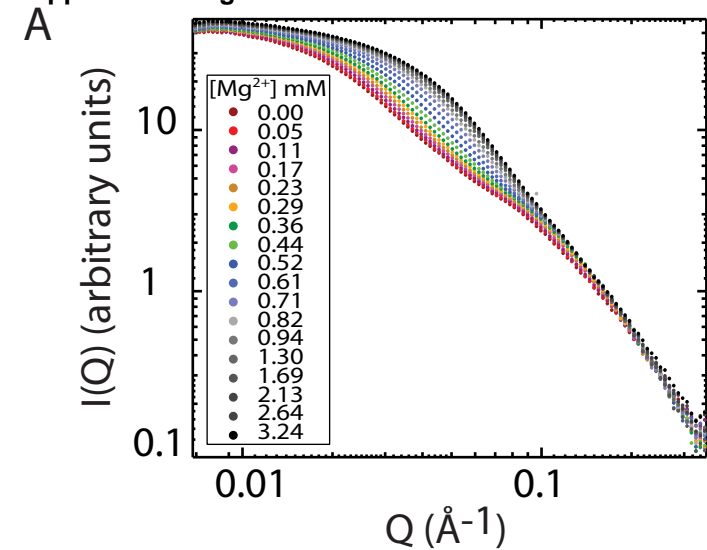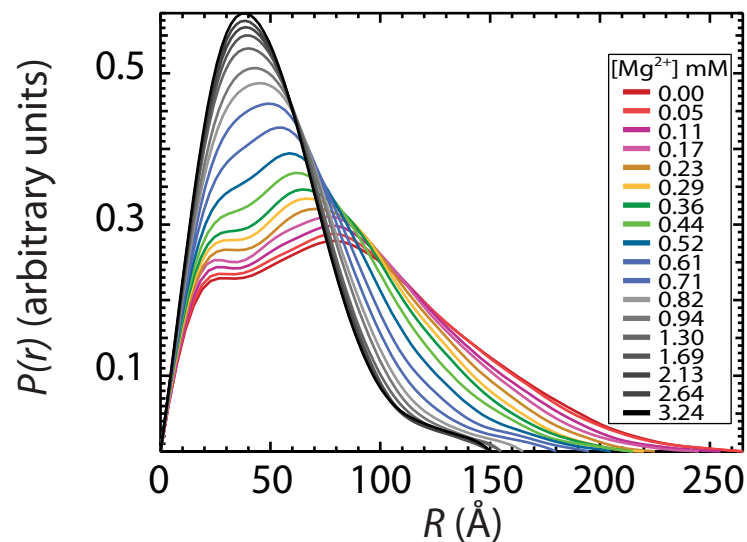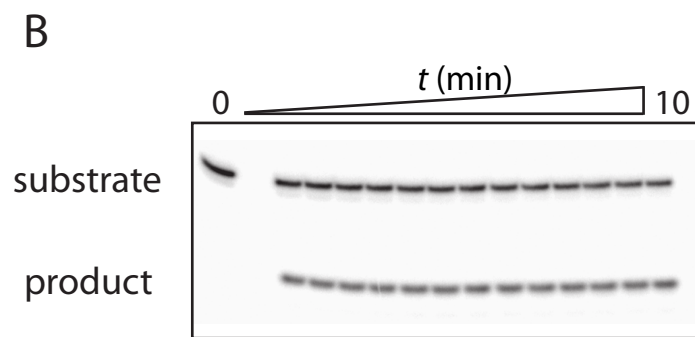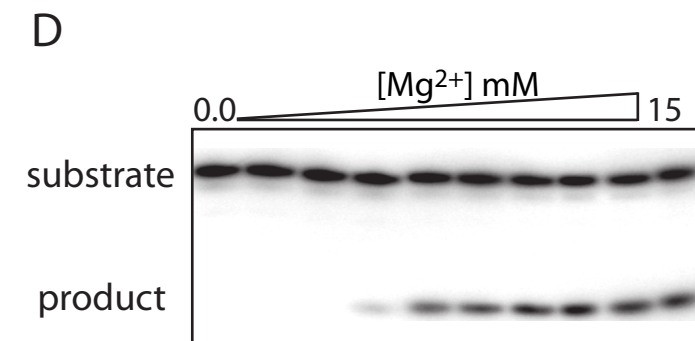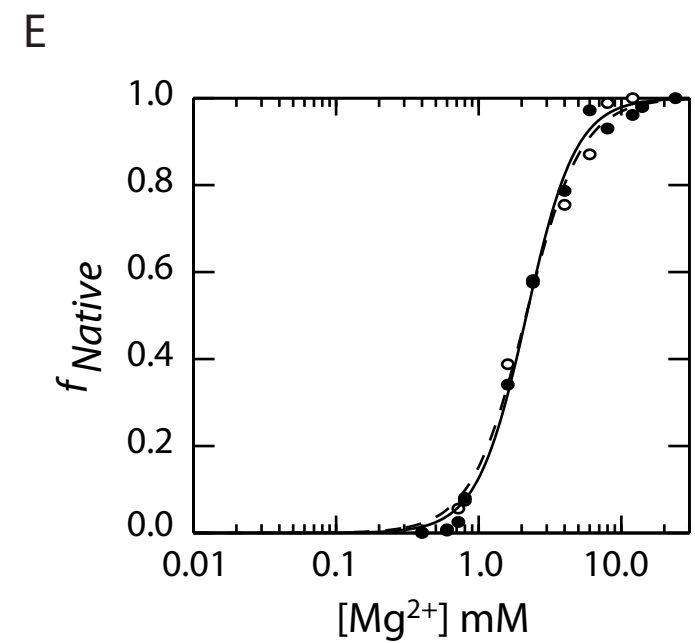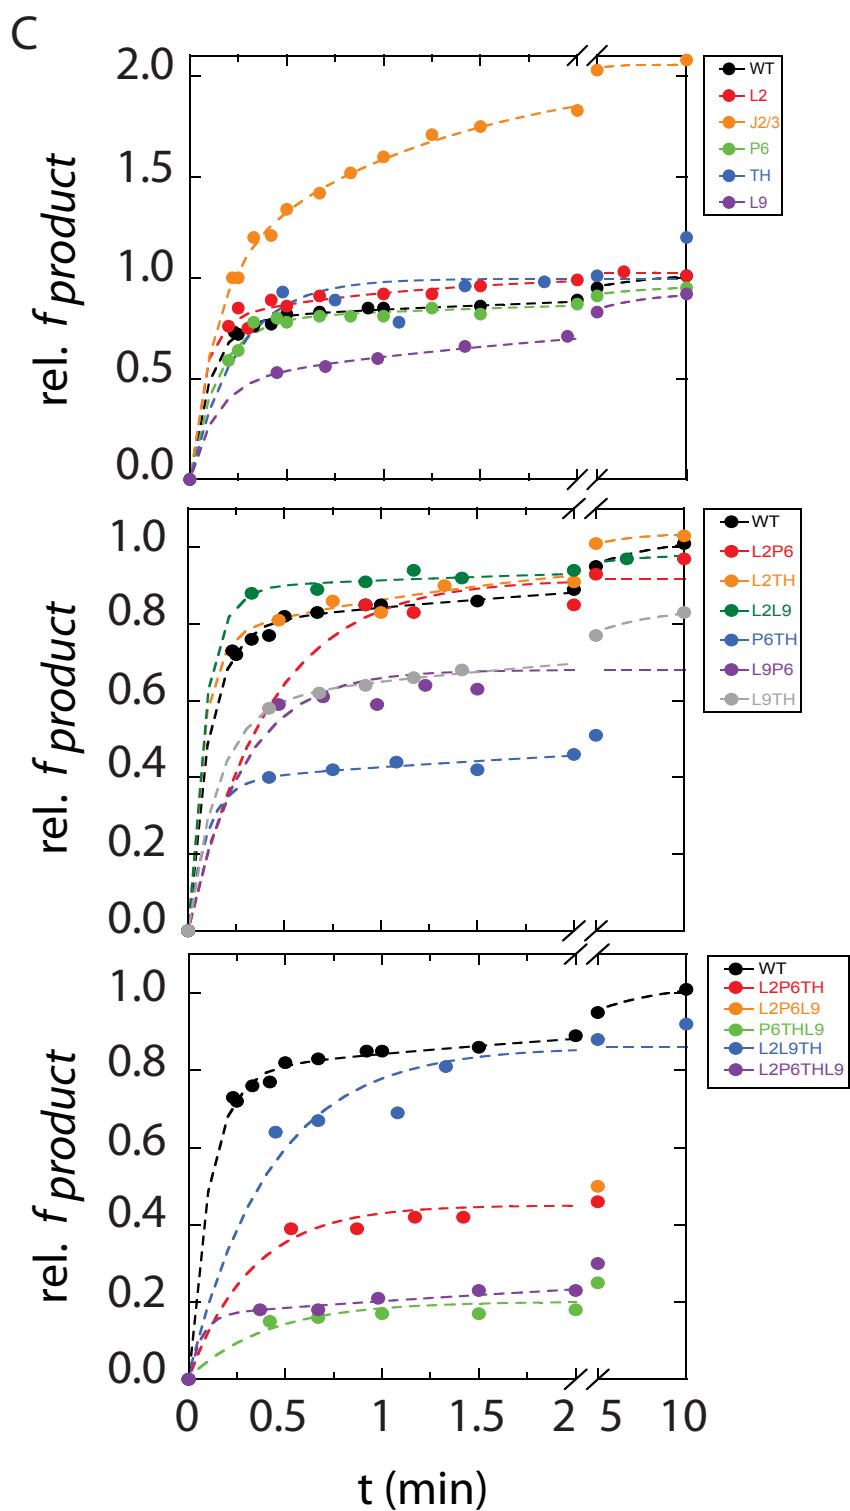

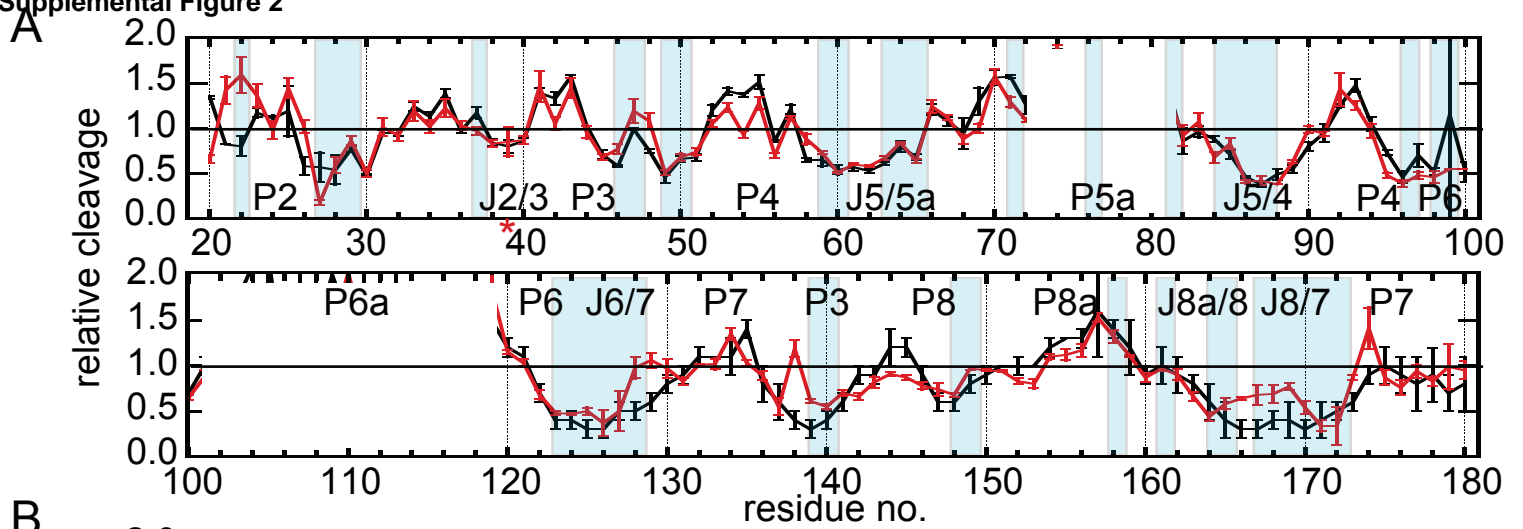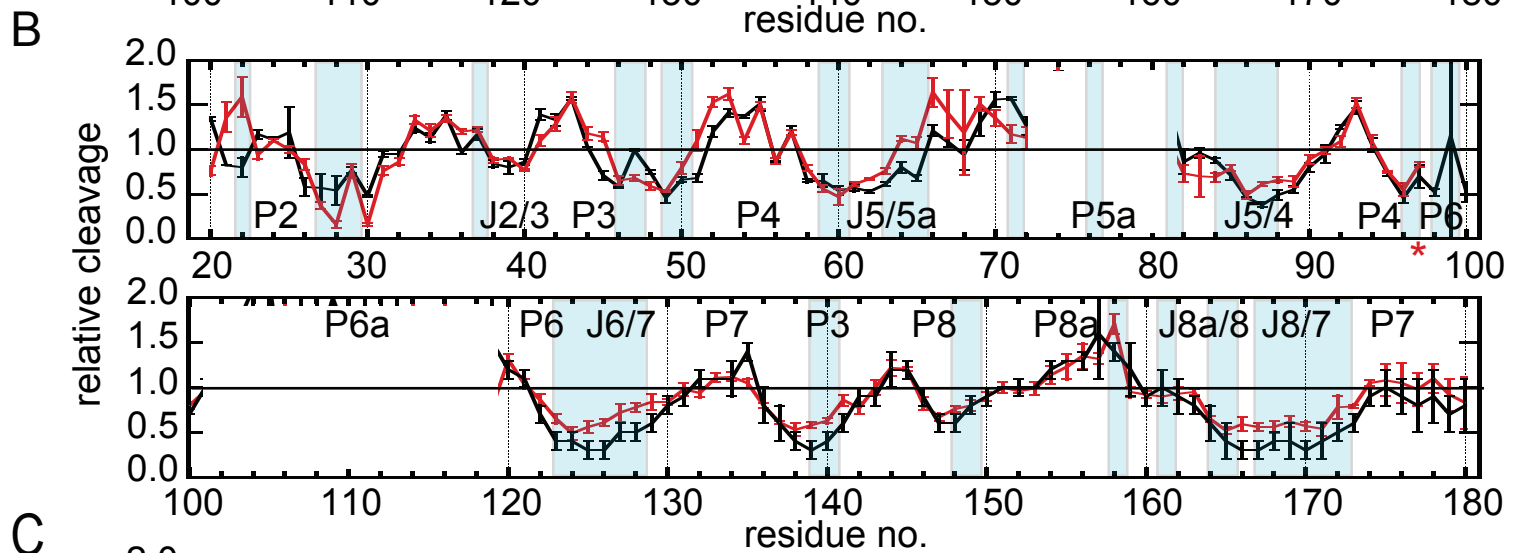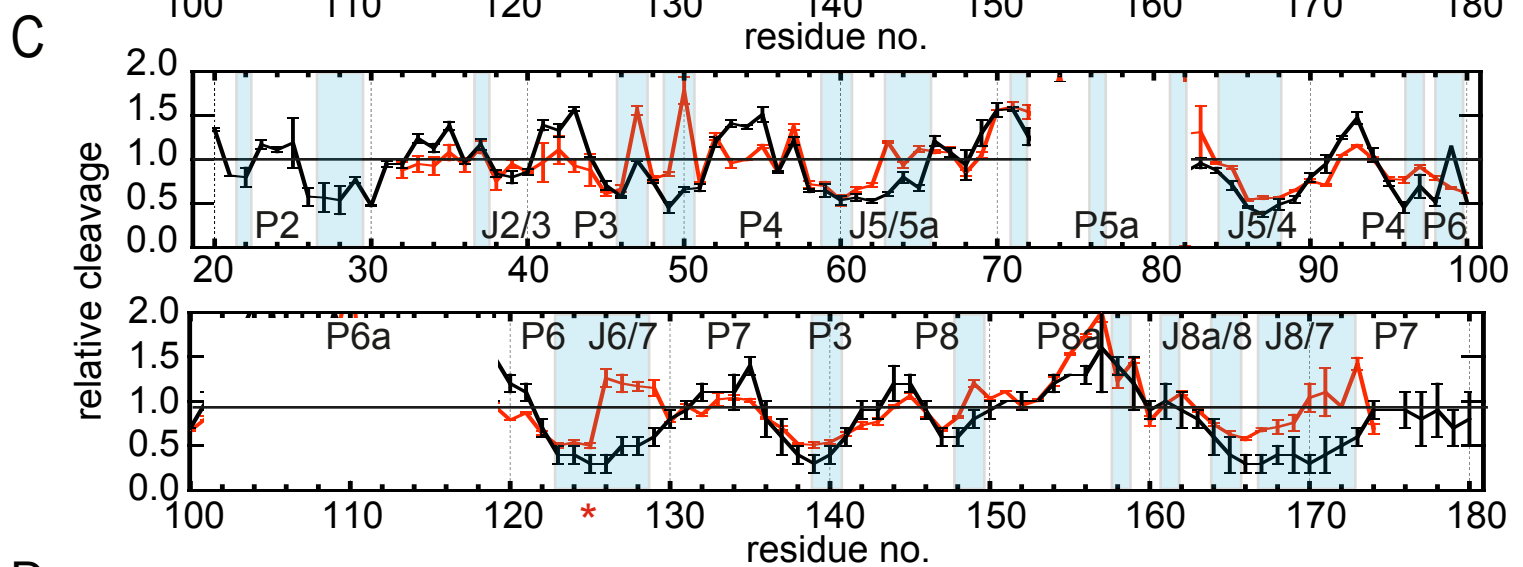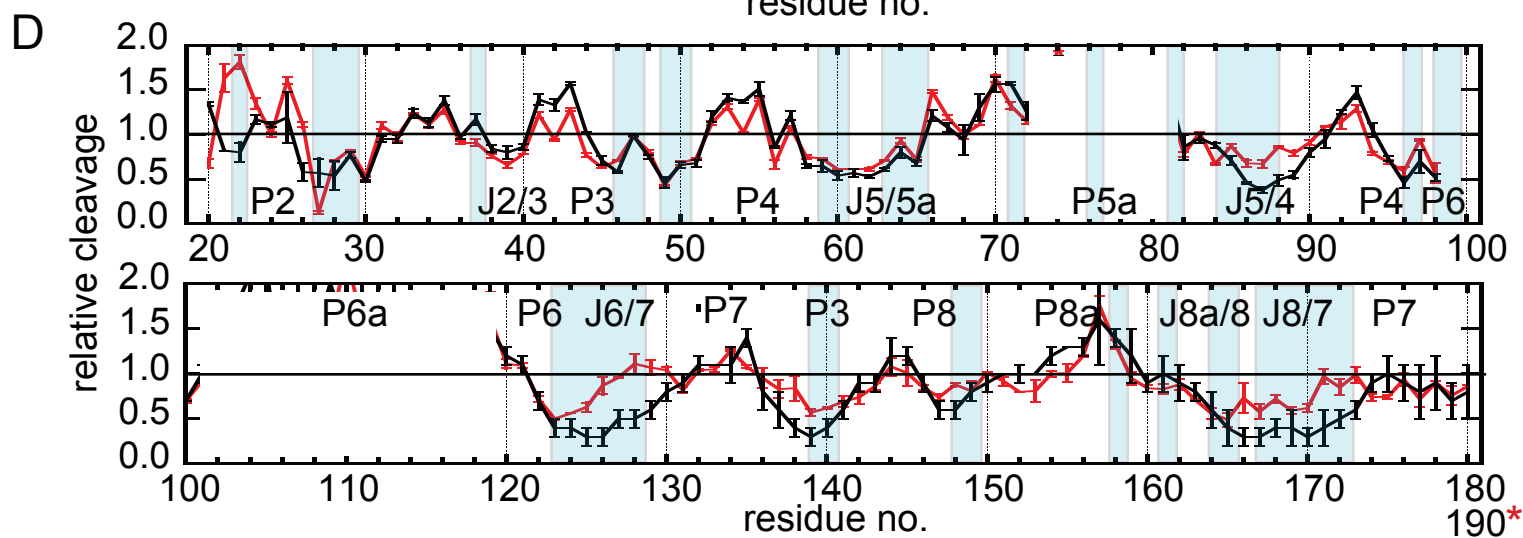

**Supplemental Figure 3**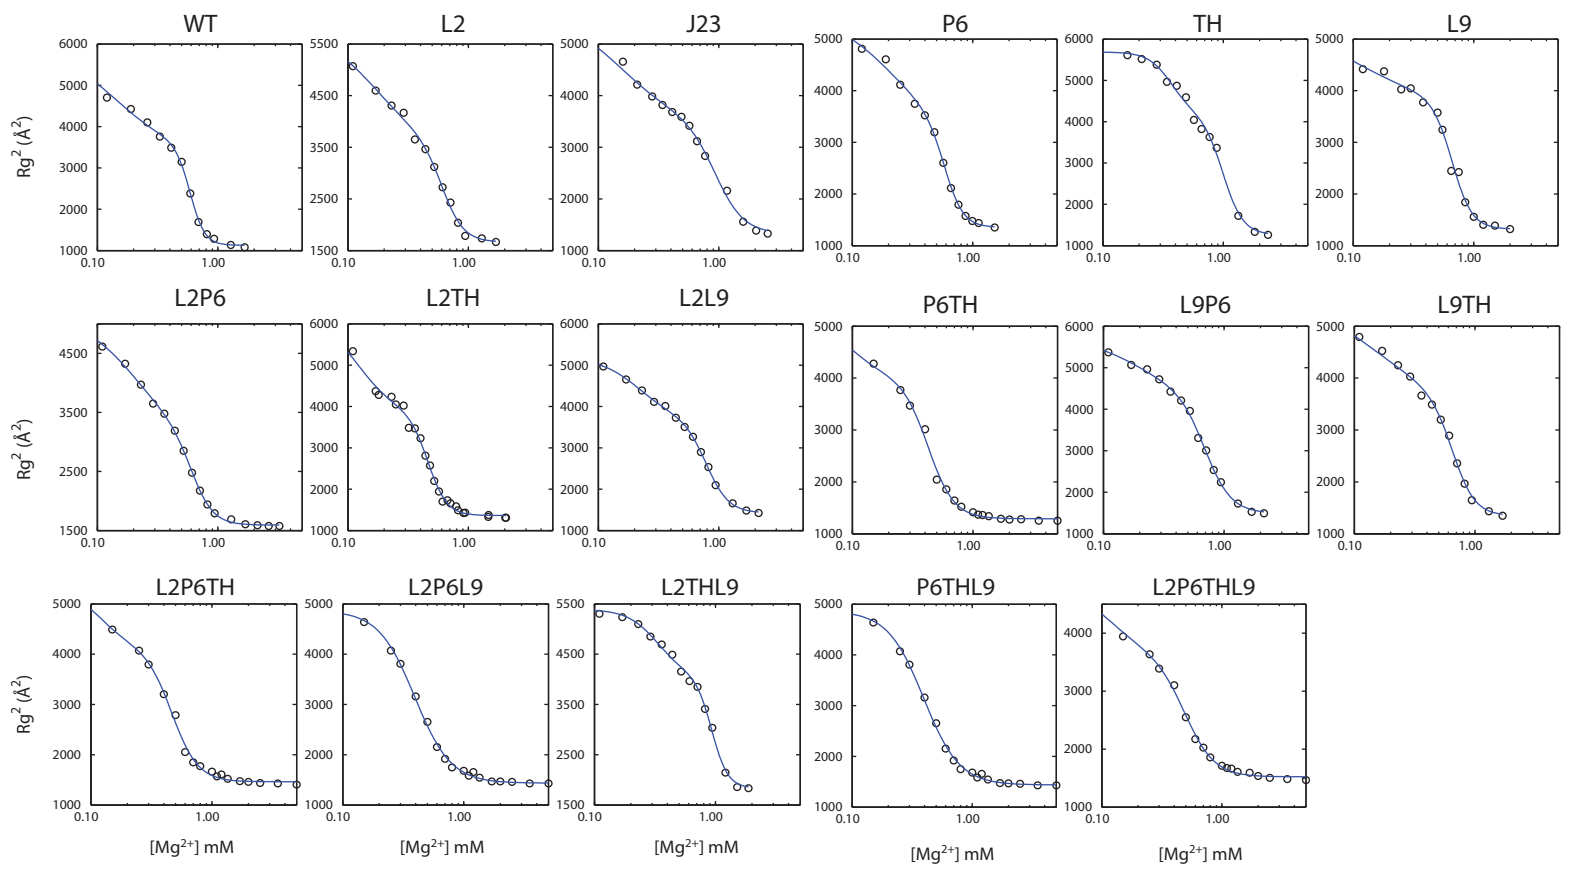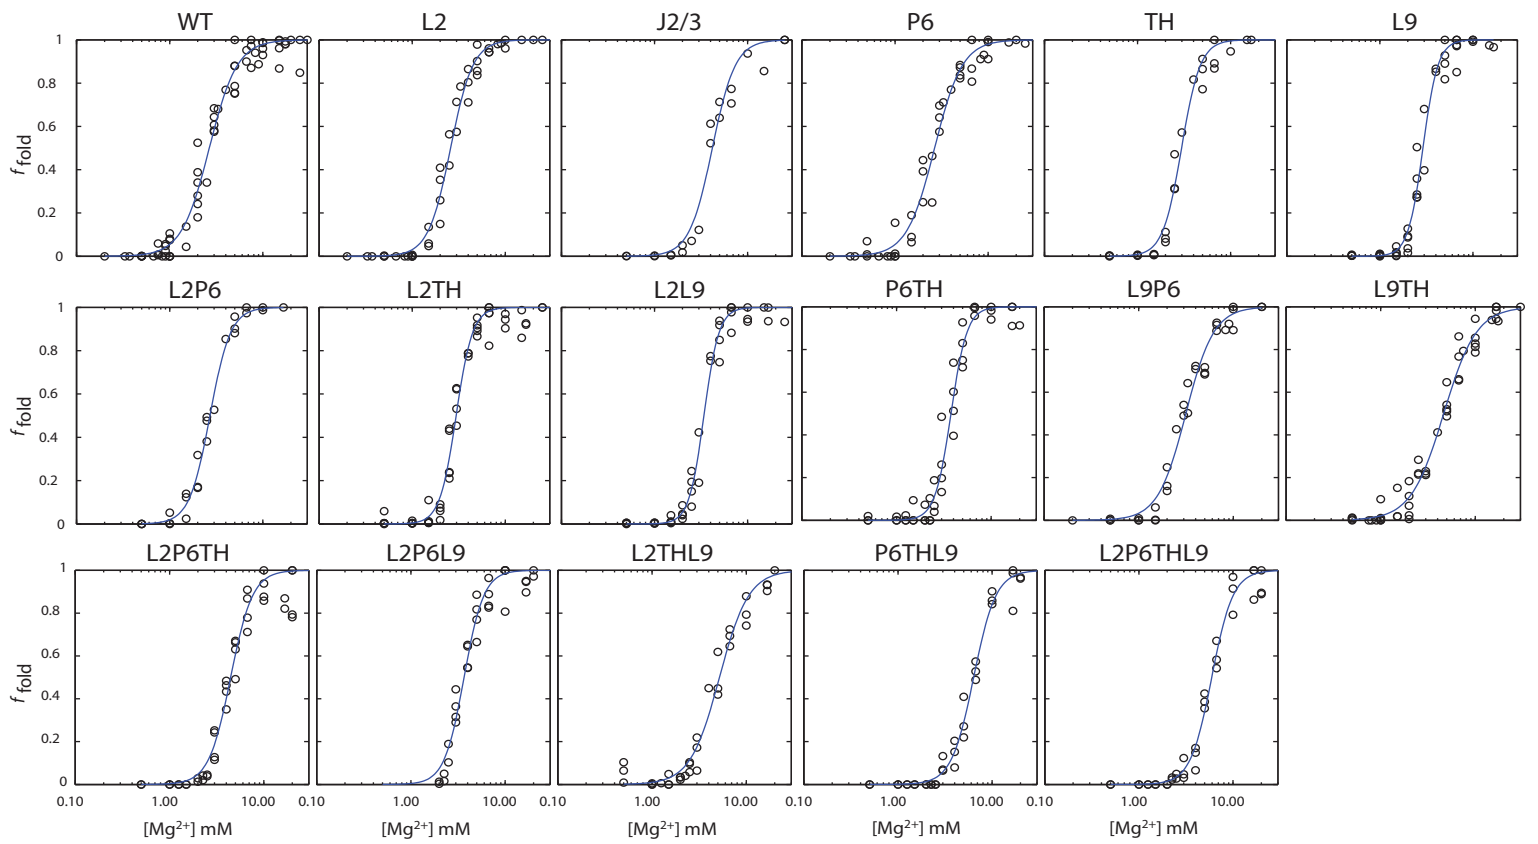

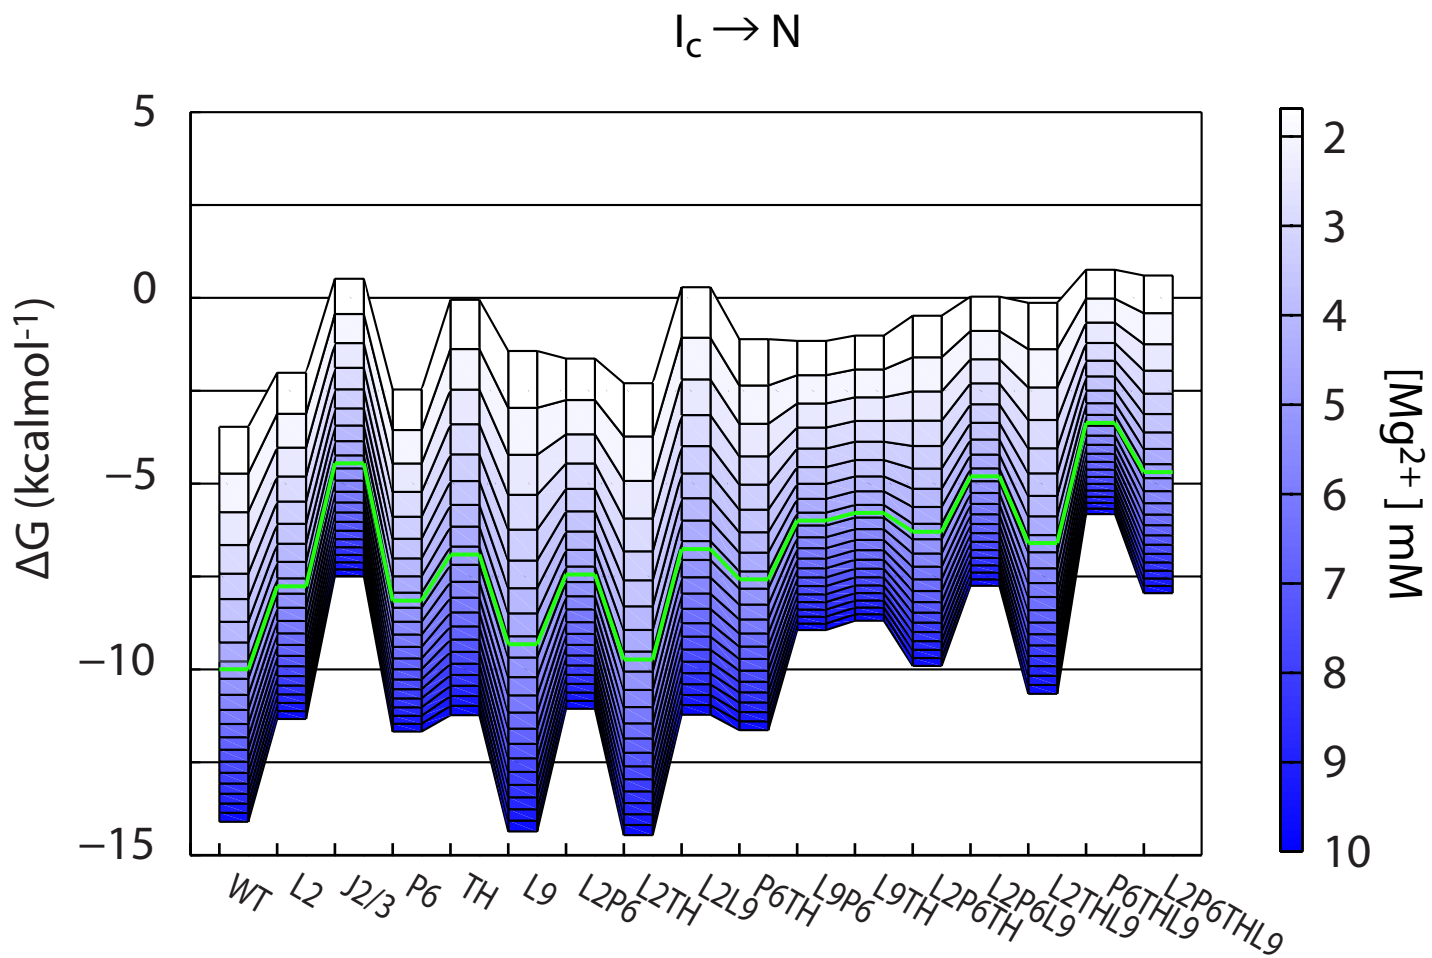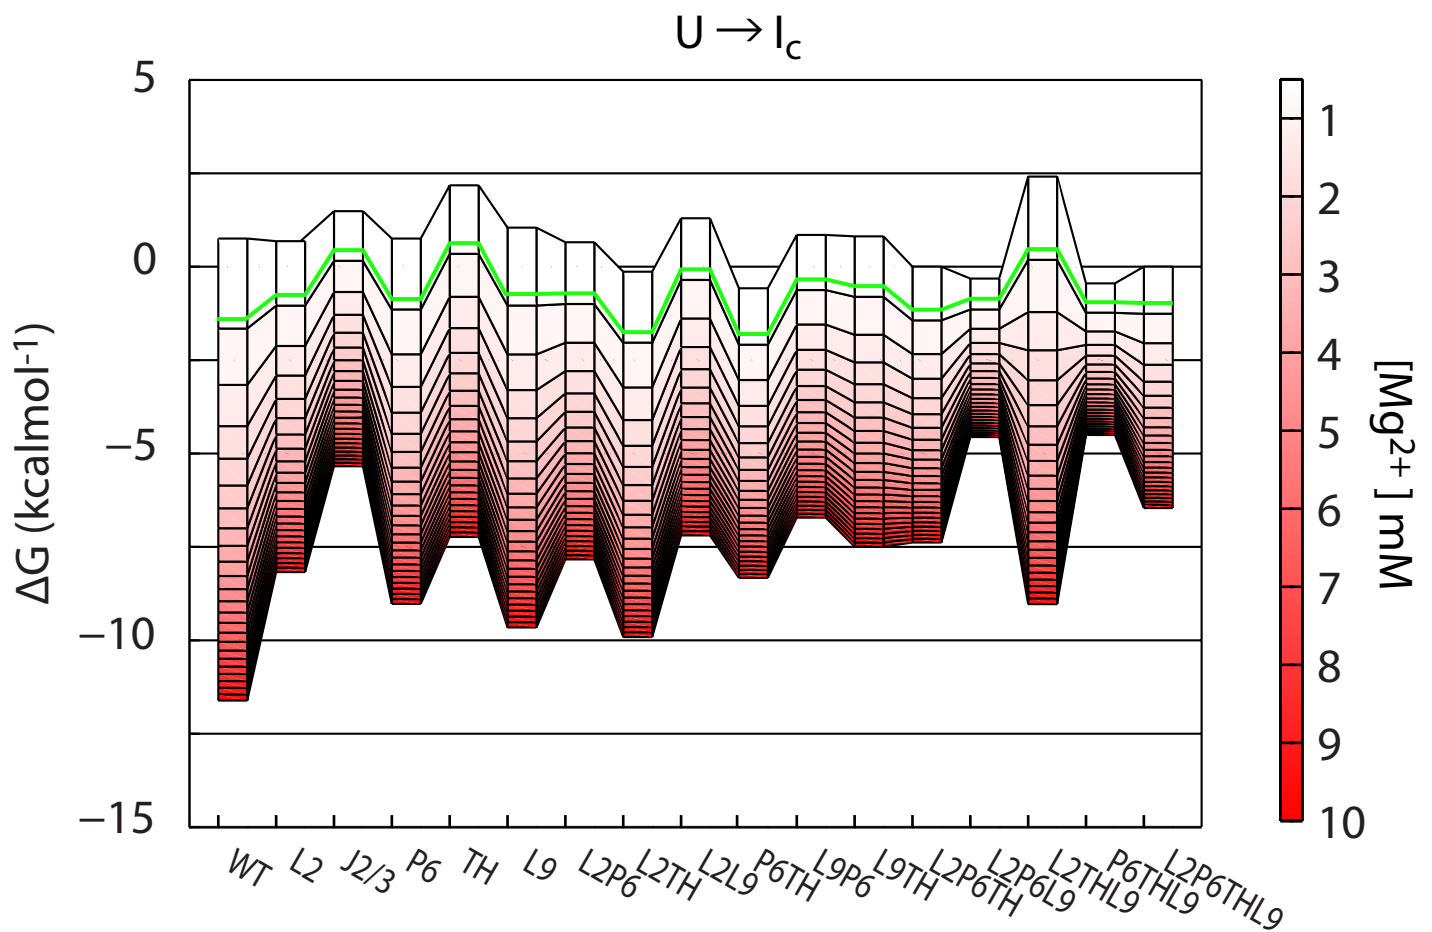

A

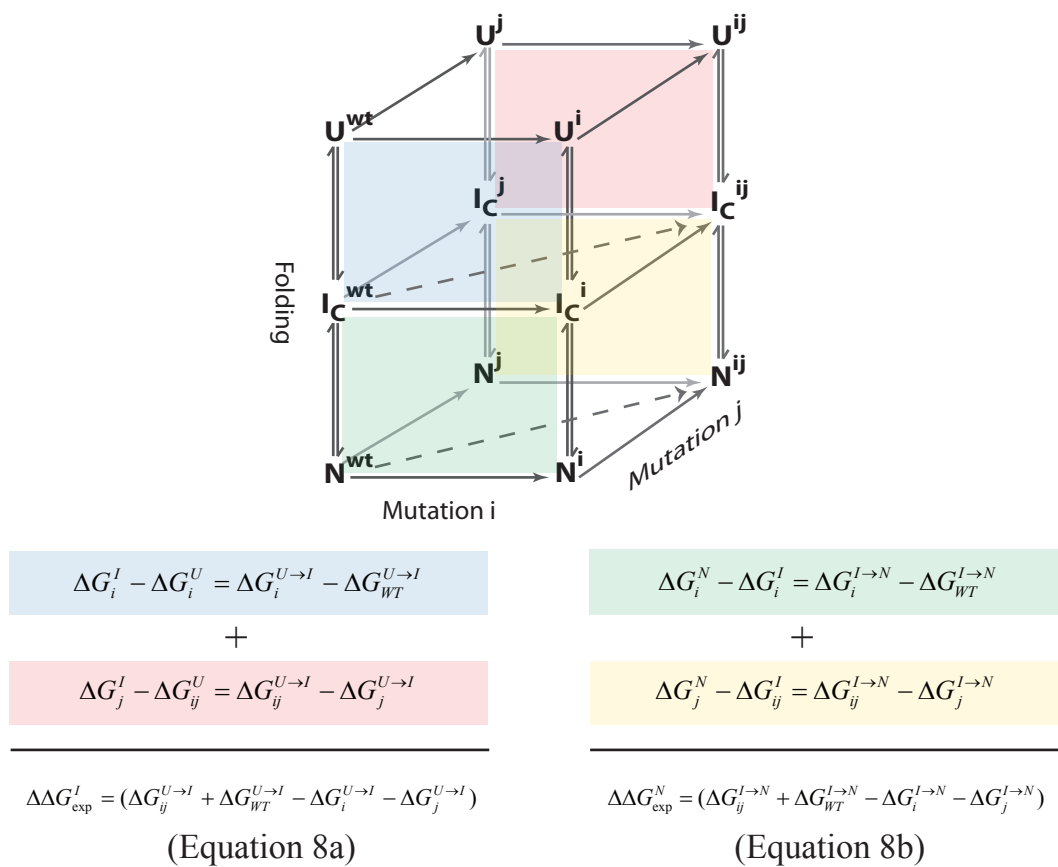

B

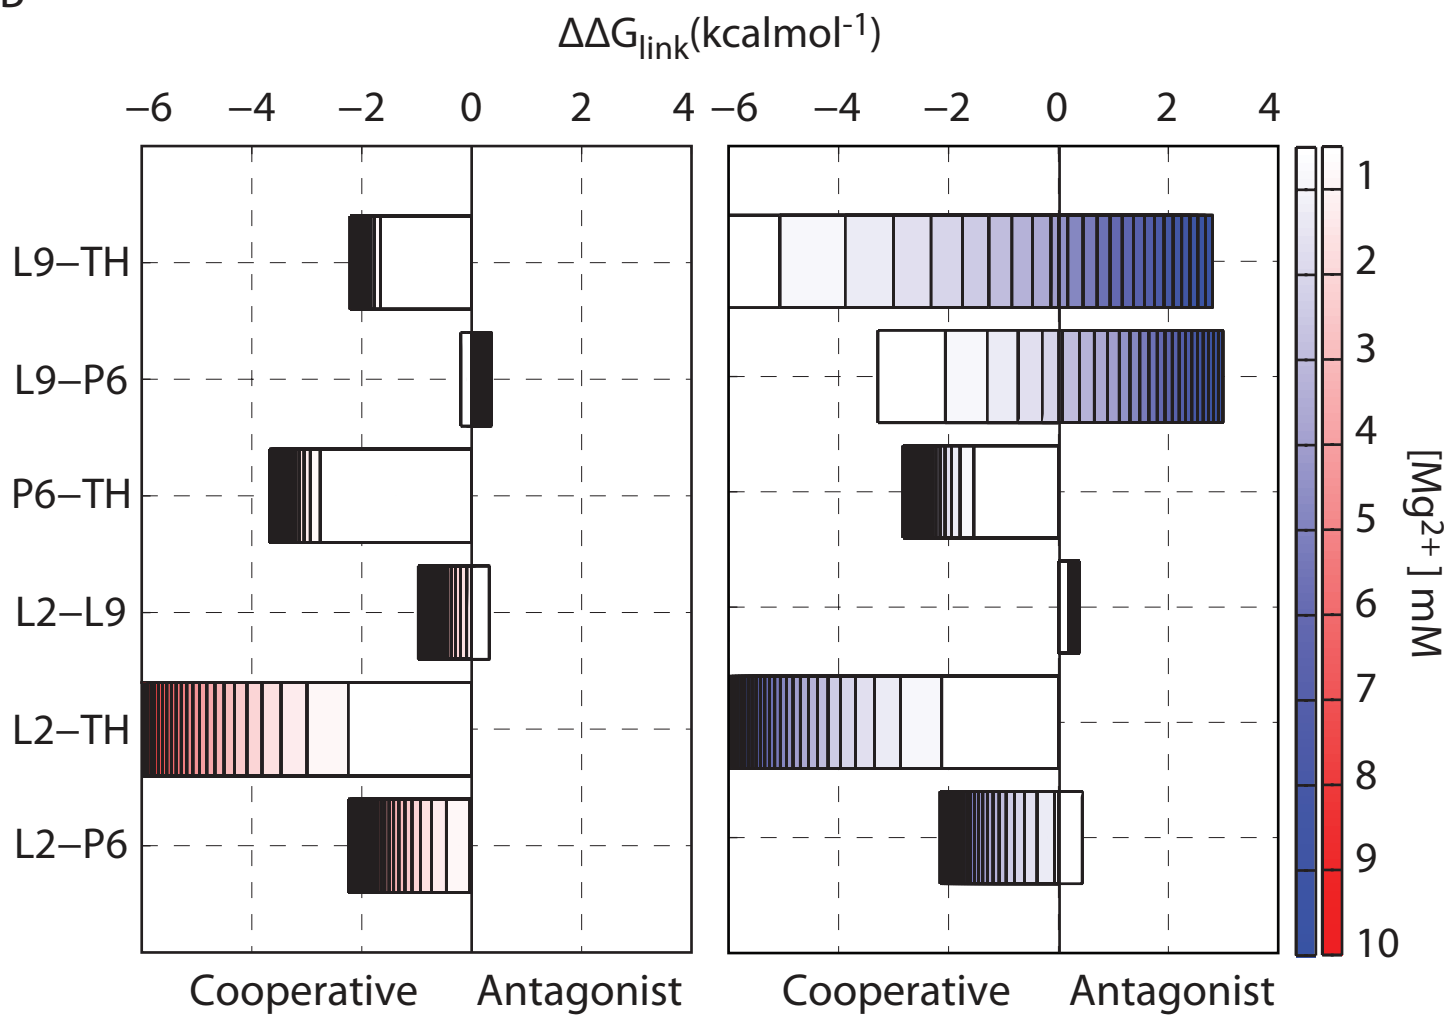

Supplement: NIHMS368152-supplement-02.pdf [file NIHMS368152-supplement-02.pdf]
